# Supplementary material for: Sexual dimorphism in skull size and shape of Laticauda colubrina (Serpentes: Elapidae)
Source: PeerJ. 2023 Oct 18;11:e16266. doi: 10.7717/peerj.16266 (PMC10590095; doi:10.7717/peerj.16266)
Supplement: Supplemental Information 2 — All linear measurements are in milimeters, body weight is in gramms. FMNH refers to voucher numbers of Laticauda colubrina from the Field Museum (Chicago) collection. For abbreviations see the main text. [file peerj-11-16266-s002.xlsx]

## Sheet: Arkusz1
FMHN	species	sex	SVL	Weight	SL	SH	SW	PW1	PW2	PAR	NCL	NL	NW	FL	FW1	FW2	PLL	PTL	PTTL	PMW	PRETR	PML	MXL	MDL	MD2L	DENT	FMDB	ECT	QL	CQL	PFL	PFH	STP
236244	Laticauda colubrina	f	605	52	13.14	3.85	6.49	4.8	5.1	5.91	3.3	1.77	1.83	2.56	3.24	3.06	3.08	9.61	6.16	1.95	1.36	0.91	2.53	14.76	12.89	4.09	3.28	5.57	3.22	2.09	0.91	2.71	4.76
236550	Laticauda colubrina	f	630	106	14.86	4.35	8.25	6	5.39	6.57	4.18	2.2	2.23	2.8	3.93	3.25	3.24	10.89	7.47	2.35	1.37	1.3	2.74	16.84	14.98	5.41	4.12	6.53	3.84	2.33	1.23	3.67	5.26
236249	Laticauda colubrina	f	785	174	16.68	4.71	9	6.1	5.65	8.48	5.06	2.1	2.54	2.81	4.6	3.76	3.89	13.48	9.59	2.73	2.04	1.26	3.17	20.46	17.76	5.77	5.21	7.81	4.9	2.47	1.29	4.35	6.3
236247	Laticauda colubrina	f	905	263	18.06	5.37	9.97	7	5.88	8.2	5.14	2.42	3.24	2.99	5.18	4.41	4.24	15.36	11.44	3.4	2.21	1.66	3.79	23.12	20.28	6.22	6.3	8.88	5.73	3.11	1.33	4.66	7.72
236246	Laticauda colubrina	f	1000	321	21.09	6.07	11.58	8.4	6.76	9.99	6.14	2.81	3.76	3.41	6.36	4.61	5.08	16.82	12.17	3.96	2.59	1.77	4.45	25.96	22.63	7.67	6.74	10.39	6.56	3.81	1.73	5.46	8.61
236240	Laticauda colubrina	f	1015	375	21.71	6.14	11.91	8.1	6.68	9.56	6.72	3.19	4.22	3.59	6.44	5	5.01	18.29	12.37	4.43	2.77	1.97	4.75	27.28	23.43	8.07	6.5	10.7	6.53	3.53	1.5	5.49	8.95
236237	Laticauda colubrina	f	1050	351	21.04	6.36	11.25	8	6.51	10.21	6.54	2.91	3.6	3.39	6.67	5.24	4.99	18.25	12.34	4.04	2.85	1.81	4.44	26.75	22.86	8	7.71	10.43	7.24	3.91	1.65	5.11	9.01
235390	Laticauda colubrina	f	1052	908	19.6	5.61	11.4	8.1	6.39	9.42	6	3	3.46	3.65	6.24	4.87	4.2	15.51	10.67	3.65	2.31	1.69	4.07	24	20.88	6.96	5.5	9.16	5.68	4.07	1.55	5.16	7.62
235389	Laticauda colubrina	f	1070	528	23.56	6.86	14.75	9.6	6.99	10.66	6.86	3.68	4.48	4.12	8.09	6.57	5.54	19.36	14.16	4.71	2.79	1.98	5.22	28.84	25.59	8.4	7.01	11.53	7.66	4.19	1.87	6.26	9.86
236239	Laticauda colubrina	f	1150	748	24.35	7.12	13.31	9.5	6.98	11.28	7.44	3.64	4.24	4.24	7.3	5.83	5.59	20.65	14.39	4.99	3.26	2.06	5.28	21.31	27.15	8.83	7.77	12.39	8.36	4.56	1.55	6.28	10.73
236336	Laticauda colubrina	f	1160	729	22.16	6.55	13.05	8.8	6.82	10.89	6.87	3.17	4.66	4.48	7.19	5.28	5.62	20.24	13.51	4.7	3.02	2.09	4.76	30.28	26.35	8.63	7.19	11.53	8.05	4.25	1.68	6.03	11.13
235407	Laticauda colubrina	f	1177	824	25.84	7.46	14.08	9.6	7.04	11.88	7.46	2.99	4.65	4.42	7.56	5.09	6.1	22.22	16.57	5.28	3.17	2.28	5.47	33.53	29.3	9.91	8.47	13.45	9.02	4.43	1.55	6.5	11.93
236241	Laticauda colubrina	f	1207	701	23.98	7.42	13.86	9.5	6.93	10.83	7.14	3.53	4.59	4.16	7.77	6.05	5.8	29.73	14.62	4.74	3.27	2.14	5.41	31.68	27.31	9.44	7.72	12.33	8.55	4.57	1.83	6.59	11.3
235387	Laticauda colubrina	f	1210	845	23.83	7.13	14.3	9.3	6.89	11.6	7.53	3.4	4.76	4.05	7.56	6.07	6.01	21.82	15.34	4.94	3.34	2.19	5.07	31.78	27.71	9.35	7.94	11.93	8.14	4.76	2.08	6.49	11.47
236235	Laticauda colubrina	f	1220	727	24.17	6.75	13.03	9.2	6.82	10.97	6.92	2.81	4.16	4.12	7.26	5.71	6.06	21.48	14.94	4.78	3.36	2.3	5.2	32.24	27.98	9.03	7.84	11.87	4.52	5.49	2.06	6.15	11.3
236233	Laticauda colubrina	f	1235	676	25.43	7.63	15.07	9.7	7.09	12.17	8.07	3.66	4.81	4.58	8.02	5.49	6.7	22.59	14.82	5.23	3.41	2.15	5.62	34.26	29.55	9.9	8.26	13.86	9.68	5	2.08	6.83	12.78
235398	Laticauda colubrina	f	1250	698	20.25	5.87	9.5	8.8	6.3	9.64	5.88	3.9	3.49	4.12	6.77	5.52	4.84	16.79	11.48	4.4	2.21	1.65	4.19	24.92	21.68	7.79	6.2	9.91	6.78	3.85	1.43	5.24	8.15
236234	Laticauda colubrina	f	1350	980	30.59	9.14	18.21	11.9	7.32	14.21	9.43	4.34	5.83	6.05	10.04	6.78	7.92	25.79	17.95	6.48	3.91	2.77	7.01	41.57	36.44	11.94	10.68	15.36	11.9	5.79	2.07	8.3	15.33
236256	Laticauda colubrina	f	1440	1863	31.57	9.54	17.84	11.4	7.67	15.16	10.77	4.09	6.3	5.17	10.21	6.29	8.81	27.49	19.17	6.63	4.18	3.07	6.82	41.72	36.68	11.41	10.05	15.69	12.26	5.79	2.26	8.28	14.75
236257	Laticauda colubrina	f			18.14	5.27	9.54	6.8	5.84	7.94	4.81	2.44	3.12	3.37	4.01	3.78	3.92	14.63	10.24	3.25	2.14	1.28	3.62	21.82	18.92	6.73	5.49	8.46	5.22	2.86	1.17	4.45	7.18
234154	Laticauda colubrina	f			18.33	5.15	10.17	7.4	6.32	8.23	4.69	2.24	3.12	3.37	5.77	4.92	4.26	14.19	10.69	3.36	2.18	1.45	3.78	21.09	18.39	6.8	4.24	8.72	4.99	2.97	1.76	4.56	6.34
236269	Laticauda colubrina	f			18.86	5.61	10.88	8	6.24	8.73	6.15	2.26	3.26	3.12	7.79	5.13	4.31	15	11.64	3.63	2.3	1.55	4.11	24.33	21.26	6.77	5.69	9.36	6.07	3.1	1.24	4.93
236268	Laticauda colubrina	f			19.32	5.68	10.63	7.9	6.51	8.86	5.27	2.67	3.02		5.82	5.04	5.01	14.4	9.59	3.2	2.2	1.63	3.92	22.31	19.63	6.98	4.96	8.54	5.5	3.37	1.59	5.01	7.19
234153	Laticauda colubrina	f			21.73	6.27	9.81	8.2	6.19	9.67	5.87	2.89	4.28	3.6	6.57	5.04	5.07	17.99	11.81	4.26	2.61	1.53	4.67	26.76	23.56	8.02	5.74	9.92	6.83	3.9	1.76	5.94	8.73
236559	Laticauda colubrina	f			23.22	6.74	13.66	9.7	6.84	10.54	7.55	3.81	4.65	4.06	4.43	6.31	5.88	20.63	13.77	4.44	2.94	2.06	5.28	30.74	26.89	8.11	7.21	11.05	8.5	4.68	1.9	6.06	10.51
236260	Laticauda colubrina	f			23.49	6.97	13.81	9.1	6.89	10.78	7.43	3.3	4.19	3.27	7.4	5.97	5.72	20.05	14.42	4.32	3.22	1.71	5.04	30.72	26.44	8.97	7.46	11.84	8.45	4.46	2.06	6.39	10.83
236270	Laticauda colubrina	f			23.72	7.25	13.9	7.2	5.31	11.11	7.58	3.62	4.36	3.79	7.33	5.02	6	20.17	14.24	4.78	3.5	2.37	5.01	30.73	26.6	8.37	7.6	12.2	8	4.04	1.94	6.43	9.99
234150	Laticauda colubrina	f			24.41	7.49	11.46	10.1	7	11.4	7.51	3.23	4.68	4.34	7.74	5.3	6.06	22.18	15.58	5.1	3.53	2.48	5.66	33.01	28.98	9.16	8.41	13.68	9.12	4.28	2.14	6.52	10.46
236265	Laticauda colubrina	f			25.2	7.52	14.31	9.6	7.18	11.46	7.48	3.2	4.73	4.35	7.65	6.45	6.02	21.49	14.67	4.93	3.28	2.01	5.58	32.4	28.78	9.76	8.09	12.12	8.59	4.46	1.68	6.36	11.13
236264	Laticauda colubrina	f			25.39	8.04	15.33	9.9	7.37	11.77	8.21	4.17	4.74	4.77	8.62	6.67	6.44	22.56	15.32	5.09	3.6	2.32	5.88	34	29.68	10.15	8.36	12.65	10.05	4.86	1.99	7.22	11.86
236258	Laticauda colubrina	f			27.83	8.7	17.46	10.7	7.4	13.1	9.21	3.96	5.16	5.42	9.74	7.61	7.59	24.53	17.56	5.56	3.64	2.74	6.62	37.37	32.46	11.51	8.56	14.09	11.77	5.6	2.72	8.1	14.05
236272	Laticauda colubrina	f			29.97	9.08	18.14	11.8	7.64	14.83	8.99	4.71	5.72	5.2	10.27	7.56	7.4	26	19.26	6.36	3.95	2.67	6.97	39.67	34.04	11.71	10.2	15.48	11.06	6.01	2.39	8.16	15.1
235415	Laticauda colubrina	f			30.33	9.02	17.71	11	7.61	14.36	9.59	4.73	6.03	5.12	9.71	7.55	7.22	25.27	18.16	6.32	4	2.57	6.84	40.92	35.77	12.84	9.68	14.82	11.85	5.47	2.31	7.84	15
236318	Laticauda colubrina	m	587	74	14.4	4.17	7.1	5.8	5.08	6.46	3.59	2.12	2.26	2.49	3.81	3.48	2.56	10.83	7.34	2.13	1.67	0.94	2.4	15.7	13.52	4.03	3.61	6.05	3.77	2.48	1.28	3.56	5.62
236302	Laticauda colubrina	m	589	58	13.31	3.93	6.6	5.5	5.03	6.05	3.63	1.64	2.16	2.28	3.59	3.31	2.7	9.86	7.8	2.05	1.43	0.97	2.33	14.49	12.47	4.31	2.97	4.75	3.18	2.1	0.67	2.98	4.3
236293	Laticauda colubrina	m	605	88	14.16	4.22	6.87	5.5	5.07	6.55	3.71	1.83	2.41	2.55	3.68	3.29	2.94	10.83	8.08	2.36	1.64	1.15	2.48	15.75	13.65	4.65	4.27	5.88	3.69	2.28	0.78	3.21	4.77
236316	Laticauda colubrina	m	650	111	14.47	4.22	7.46	5.8	5.24	6.59	3.63	2.08	2.33	2.6	4.03	3.57	3.13	10.62	6.87	2.31	1.66	1.06	2.59	16.38	14.01	4.76	3.95	5.97	3.74	2.55	0.97	3.26	4.95
236314	Laticauda colubrina	m	670	104	14.81	4.35	7.6	6	5.31	6.18	3.55	2.18	2.27	2.47	4.01	3.49	3.26	12.54	7.58	2.32	1.69	0.92	2.61	16.6	13.9	4.75	4.58	6.69	3.77	2.6	0.92	3.48	4.91
236324	Laticauda colubrina	m	785		17.52	5.12	9.52	6.8	6.36	7.89	5.19	2.37	3.3	3.17	5.15	4.43	3.46	13.56	9.44	3.58	1.67	1.36	3.85	21.97	18.43	6.55	4.15	8.16	5.16	3.38	1.29	4.33	6.66
236323	Laticauda colubrina	m	795	197	20.29	5.69	11.03	7.6	6.61	9.55	5.65	2.42	3.74	3.6	6.5	5.28	5.25	16.24	10.81	3.43	2.3	1.81	4.37	24.8	21.38	7.75	5.95	8.75	5.69	3.49	1.25	4.91	8.02
235410	Laticauda colubrina	m	800	327	19.57	5.93	11.1	7.9	6.38	8.85	5.3	3.02	3.44	4.02	6.43	5.08	4.91	15.51	10.12	3.32	2.26	1.43	4.15	23.37	20.55	7.28	5.46	9.54	5.69	3.84	1.39	4.85	7.54
236322	Laticauda colubrina	m	815	286	19.41	5.47	10.03	8	6.35	8.69	5.39	2.43	3.12	3.68	5.92	4.73	3.97	15.27	10.72	3.7	2.03	1.61	3.58	22.25	19.61	6.85	5.19	9.06	5.34	3.55	1.48	5	7.64
235400	Laticauda colubrina	m	835	273	18.29	5.22	9.55	7.2	6.37	7.69	4.66	2.4	2.93	3.3	5.35	4.74	4.3	14.42	10.13	3	2.23	1.3	3.49	21.18	18.2	6.32	5.64	8.24	5.17	3.24	1.81	4.19	6.64
235402	Laticauda colubrina	m	845	307	18.52	5.64	10.93	7.9	6.7	8.83	5.67	2.48	3.38	3.66	5.92	5.13	3.98	14.76	9.66	3.88	2.11	1.78	3.82	22.75	19.87	6.68	5.18	9.01	5.92	3.48	1.33	5.04	7.06
235388	Laticauda colubrina	m	850	278	19.5	5.6	10.5	7	6.65	8.73	4.24	2.29	2.77	3.52	5.9	5.25	4.48	15.51	12.08	3.75	2.4	1.48	3.82	22.38	19.64	7.09	5.02	8.87	5.53	3.69	1.45	4.92	8.1
235425	Laticauda colubrina	m	870	218	18.49	5.11	9.59	6.8	5.93	8.6	5.28	2.74	3.04	3.47	5.33	3.77	4.12	14.87	10.75	3.64	2.17	1.35	4.26	22.75	19.94	6.85	5.42	9.72	5.54	2.98	1.36	4.62	7.63
235417	Laticauda colubrina	m	875	391	19.14	5.31	10.55	7.7	6.68	8.27	5.25	2.73	2.91	3.73	5.93	4.48	4.69	14.98	10.25	3.68	2.27	1.54	4.14	22.98	20.03	6.98	5.23	7.04	5.71	3.27	1.25	4.12	7.39
235399	Laticauda colubrina	m	875	291	19.75	5.8	10.64	8	6.43	8.8	5.56	2.44	3.46	4.02	6.5	5.05	4.8	15.81	11.18	3.76	2.1	1.62	4.22	23.7	20.45	7.74	5.27	8.11	5.87	3.75	1.41	4.84	7.85
236315	Laticauda colubrina	m	885	316	18.33	5.38	10.05	7.7	6.55	8.06	5.13	2.75	3.13	3.28	5.33	4.34	4.19	14.78	10.18	3.42	2.11	1.22	3.78	21.47	18.61	6.42	4.87	8.36	5.23	3.59	1.3	4.62	6.94
236307	Laticauda colubrina	m	885	248	19.15	5.46	10.05	7.4	6.6	9.07	5.59	2.2	2.67	3.51	5.67	4.99	4.18	14.24	9.97	3	1.9	1.64	4.15	21.88	18.99	7.02	5.08	8.18	5.22	3.3	1.76	4	7.05
135412	Laticauda colubrina	m	888	299	18.84	5.28	9.84	7.3	6.16	8.36	5.42	2.18	2.96	3.14	5.27	4.47	4.12	15.05	14.92	3.29	2.3	1.44	3.51	22.12	19.19	6.41	5.47	8.16	5.42	3.51	1.12	4.58	7
234157	Laticauda colubrina	m			16.6	4.8	9.53	6.4	5.51	7.45	4.58	2.47	3	3.07	4.75	3.71	3.55	13.55	9.31	3.13	1.99	1.12	3.24	19.99	17.52	5.61	5.3	7.15	4.72	3.07	1.61	4.31	6.31
234165	Laticauda colubrina	m			17.27	5.06	10.45	7.4	6.01	8.29	5	2.18	3.27	3.72	5.11	4.29	3.8	14.11	9.75	3.22	2	1.77	3.46	20.71	18.17	6.41	4.43	6.76	5.01	3.21	1.49	4.58	6.43
234160	Laticauda colubrina	m			17.39	5.29	8.2	7.1	6.33	7.8	4.84	2.69	2.95	3.64	5.41	4.56	4.07	13.46	9.33	3.64	1.86	1.39	3.56	20.58	17.69	6.14	4.64	8.68	5.15	3.18	1.42	4.71	6.61
236326	Laticauda colubrina	m			17.8	4.98	9.68	7	6.3	8.17	5	2.31	2.75	3.3	5	4.43	3.8	14.03	9.38	3.11	2.05	1.65	3.62	20.88	18.19	6.4	4.95	7.65	5.01	3.35	1.19	4.28	6.95
236325	Laticauda colubrina	m			18.02	5.15	9.71	7.1	6.21	7.29	4.75	2.36	3.18	2.96	5.57	4.69	4.79	14.33	9.54	3.1	2.27	1.37	3.51	21.31	18.43	6.37	4.68	6.06	5.3	3.3	1.31	4.4	7.44
234152	Laticauda colubrina	m			18.05	5.48	8.21	7.2	5.96	8.16	4.85	2.7	3.03	3.26	5.4	4.61	4.36	14.68	11.01	3.4	2.04	1.51	3.8	21.91	18.84	6.63	5.11	8.1	5.18	3.4	1.27	4.59	6.45
234158	Laticauda colubrina	m			18.19	5.39	10.98	7.7	6.05	7.58	5.07	2.31		3.71	5.42	4.51	3.77	13.81	9.48	3.4	1.95	1.3	3.43	21.44	18.74	6.32	4.92	7.18	5.19	3.53	1.6	5.03	6.4
234163	Laticauda colubrina	m			19.65	5.5	8.19	8.6	7.07	7.98	5.32	2.76	3.75	3.87	6.43	4.95	4	14.55	10.71	3.98	2.25	1.69	4.25	22.39	19.7	7.23	4.95	9.24	5.05	3.26	1.65	5.53	6.51
234151	Laticauda colubrina	m			24.18	7.18	11.72	9.7	7.03	11.88	7.26	3.3	4.56	4.41	7.93	6.55	6.23	20.28	15.06	4.93	3.27	2.04	5.48	32.35	28.06	9.3	7.68	12.03	8.82	4.48	2.1	6.68	10.85
